# Supplementary material
Source: PubMed Central journal article supplement (PMC5545797)
Supplement: NIHMS875814-supplement-supplement_1.pdf [file NIHMS875814-supplement-supplement_1.pdf]

1  
2  
3  
4  
5  
6  
7  
8  
9  
10  
11  
12  
13  
14  
15  
16  
17  
18  
19  
20  
21  
22  
23  
24  
25  
26  
27  
28  
29  
30  
31  
32  
33  
34  
35  
36  
37  
38  
39  
40  
41  
42  
43  
44  
45  
46  
47  
48  
49  
50  
51  
52  
53  
54  
55  
56  
57  
58  
59  
60

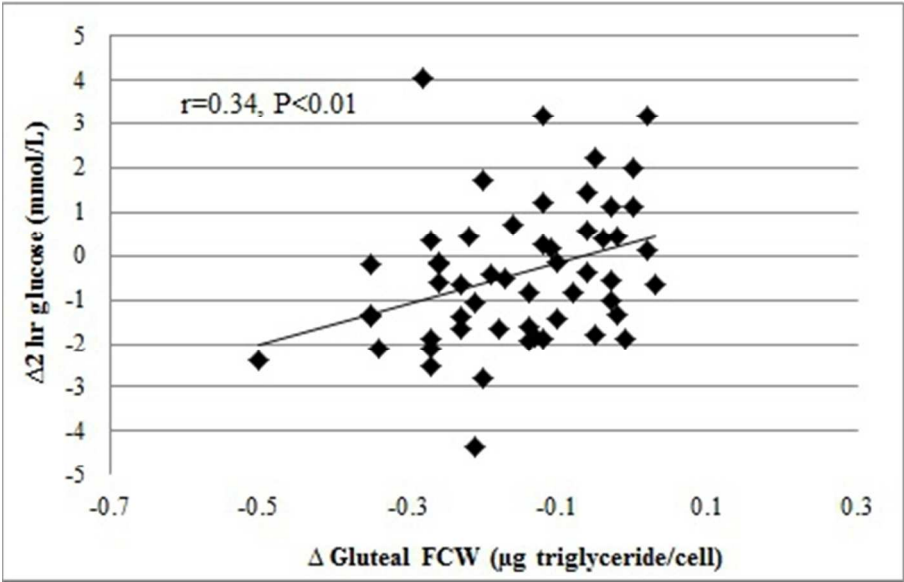

Figure 3B  
119x76mm (96 x 96 DPI)

Peer Review

Supplementary Table

|                                                    | WL            |               |               |               | AEX+WL        |               |               |               | Intervention* | Intervention | Group |
|----------------------------------------------------|---------------|---------------|---------------|---------------|---------------|---------------|---------------|---------------|---------------|--------------|-------|
|                                                    | NGT (N=15)    |               | IGT (N=13)    |               | NGT (N=20)    |               | IGT (N=12)    |               |               |              |       |
|                                                    | Pre           | Post          | Pre           | Post          | Pre           | Post          | Pre           | Post          |               |              |       |
| Weight (kg)                                        | 93.4±4.2      | 87.0±4.3‡     | 89.0±4.0      | 81.3±3.7‡     | 80.9±2.3      | 73.5±2.4‡     | 92.8±5.8      | 85.5±5.2‡     | NS            | NS           | NS    |
| BMI (kg/m <sup>2</sup> )                           | 34.0±1.5      | 31.6±1.5‡     | 34.1±1.3      | 31.2±1.2‡     | 30.6±0.9      | 27.8±0.9‡     | 35.1±1.9      | 32.4±1.8‡     | NS            | NS           | NS    |
| Waist circumference (cm)                           | 99.1±2.9      | 93.2±2.4‡     | 102.5±3.8     | 96.6±3.1‡     | 89.1±1.0      | 83.8±1.3‡     | 105.0±5.2     | 100.6±5.3‡    | NS            | NS           | NS    |
| Hip circumference (cm)                             | 120.2±3.2     | 114.5±3.0‡    | 116.3±4.7     | 111.7±4.6‡    | 112.8±1.7     | 107.3±1.5‡    | 124.9±4.4     | 117.9±4.2‡    | NS            | NS           | NS    |
| Waist to hip ratio                                 | 0.82±0.01     | 0.81±0.02     | 0.88±0.02     | 0.87±0.02     | 0.79±0.01     | 0.78±0.01     | 0.84±0.02     | 0.84±0.02     | NS            | NS           | NS    |
| Body fat (%)                                       | 47.9±1.2      | 45.9±1.5‡     | 48.6±0.9      | 45.5±1.1‡     | 45.7±1.1      | 40.8±1.5‡     | 48.8±1.7      | 45.7±2.0‡     | NS            | NS           | NS    |
| Total body fat mass (kg)                           | 44.6±2.6      | 39.6±2.7‡     | 44.1±2.8      | 37.6±2.6‡     | 37.7±1.8      | 30.9±2.0‡     | 45.8±4.3      | 40.0±4.0‡     | NS            | NS           | NS    |
| Total body fat-free mass (kg)                      | 47.3±1.3      | 45.7±1.5‡     | 45.9±1.7      | 43.5±1.6‡     | 44.2±1.1      | 43.6±1.1      | 47.0±2.9      | 46.0±2.1      | NS            | <0.05        | NS    |
| Android fat mass (kg)                              | 3.90±0.32     | 3.48±0.37‡    | 3.87±0.30     | 3.22±0.24‡    | 2.96±0.21     | 2.30±0.22‡    | 3.86±0.40     | 3.31±0.38‡    | NS            | NS           | NS    |
| Gynoid fat mass (kg)                               | 8.13±0.47     | 7.16±0.49‡    | 7.50±0.48     | 6.40±0.46‡    | 7.24±0.29     | 5.87±0.34‡    | 8.02±0.58     | 6.99±0.54‡    | NS            | NS           | NS    |
| Android/gynoid fat mass                            | 0.474±0.020   | 0.476±0.027   | 0.516±0.018   | 0.509±0.022   | 0.403±0.013   | 0.380±0.016‡  | 0.471±0.020   | 0.457±0.025   | NS            | <0.05        | NS    |
| Visceral abdominal fat area (cm <sup>2</sup> )     | 159.1±20.8    | 138.8±18.2    | 163.3±13.7    | 139.8±10.9‡   | 118.5±10.9    | 98.2±9.7‡     | 206.1±36.3    | 180.5±29.5    | NS            | <0.01        | <0.05 |
| Subcutaneous/abdominal fat area (cm <sup>2</sup> ) | 461.0±59.5    | 477.6±33.0    | 396.4±40.6    | 334.7±62.8    | 397.3±21.5    | 320.1±22.4‡   | 442.7±72.8    | 374.4±77.3‡   | NS            | <0.05        | NS    |
| Visceral to subcutaneous abdominal fat ratio       | 0.35±0.09     | 0.26±0.05     | 0.39±0.08     | 0.44±0.09     | 0.29±0.03     | 0.28±0.04     | 0.50±0.07     | 0.46±0.06     | NS            | NS           | <0.01 |
| Abdominal FCW (µg triglyceride/cell)               | 0.57±0.04     | 0.48±0.04‡    | 0.69±0.05     | 0.45±0.04‡*   | 0.54±0.02     | 0.43±0.03‡    | 0.60±0.04     | 0.51±0.03‡    | <0.01         | NS           | NS    |
| Gluteal FCW (µg triglyceride/cell)                 | 0.62±0.04     | 0.52±0.04‡    | 0.73±0.03     | 0.46±0.04‡*   | 0.61±0.02     | 0.47±0.02‡    | 0.65±0.03     | 0.53±0.03‡    | <0.01         | NS           | NS    |
| Abdominal/gluteal FCW                              | 0.9321±0.0370 | 0.9327±0.0479 | 0.9352±0.0542 | 0.9764±0.0451 | 0.8896±0.0328 | 0.9279±0.0457 | 0.9318±0.0473 | 0.9884±0.0449 | NS            | NS           | NS    |
| Absolute VO <sub>2</sub> max (L/min)               | 1.71±0.12     | 1.61±0.10     | 1.36±0.11     | 1.33±0.09     | 1.81±0.10     | 2.00±0.11‡    | 1.69±0.17     | 1.88±0.20‡    | NS            | <0.01        | NS    |
| Fasting glucose (mmol/L)                           | 5.40±0.11     | 4.94±0.07‡    | 5.46±0.12     | 5.07±0.09‡    | 5.13±0.10     | 4.95±0.09‡    | 5.47±0.16     | 5.25±0.14     | NS            | NS           | NS    |
| Fasting insulin (pmol/L)                           | 86±8          | 72±6‡         | 108±10        | 75±7‡         | 65±5          | 55±4‡         | 112±20        | 87±11‡        | NS            | NS           | <0.05 |
| HOMA-IR                                            | 3.46±0.34     | 2.64±0.23‡    | 4.36±0.42     | 2.81±0.25‡    | 2.46±0.18     | 2.02±0.16‡    | 4.72±0.93     | 3.37±0.44‡    | NS            | NS           | <0.05 |
| 2-hr glucose (mmol/L)                              | 5.70±0.33     | 5.89±0.30     | 8.96±0.24     | 7.38±0.33‡    | 6.00±0.21     | 6.37±0.29     | 9.01±0.34     | 7.38±0.40‡    | NS            | NS           | <0.01 |
| 2-hr insulin (pmol/L)                              | 485±100       | 418±67        | 1025±221      | 559±86‡       | 352±47        | 288±34        | 781±155       | 445±59‡       | NS            | NS           | <0.01 |
| Glucose AUC                                        | 821±27        | 823±33        | 1048±34       | 936±30‡       | 833±28        | 795±21        | 1063±39       | 955±41‡       | NS            | NS           | <0.01 |
